# Supplementary material for: A semi-empirical potential energy surface and line list for H 2 16 O extending into the near-ultraviolet
Source: Copernicus journal article supplement (doi:10.5194/acp-20-10015-2020), 2020-08-27
Supplement: Supplementary file 1 [file table1.pdf › table1.pdf]

Table 1: Average residuals of energy levels calculated with this PES, the POKAZATEL PES (Polyansky et al., 2018) and the PES15K PES (Mizus et al., 2018) compared to MARVEL levels (Furtenbacher et al., 2020) with  $J \leq 20$ .

| PES                        | This Work |                        | POKAZATEL |                        | PES15K |                        |
|----------------------------|-----------|------------------------|-----------|------------------------|--------|------------------------|
| $J$                        | $N_J$     | $\sigma$ (cm $^{-1}$ ) | $N_J$     | $\sigma$ (cm $^{-1}$ ) | $N_J$  | $\sigma$ (cm $^{-1}$ ) |
| E $\leq$ 15 000 cm $^{-1}$ |           |                        |           |                        |        |                        |
| 0                          | 50        | 0.03946                | 50        | 0.02923                | 50     | 0.01523                |
| 1                          | 149       | 0.02973                | 151       | 0.02539                | 151    | 0.01084                |
| 2                          | 258       | 0.02956                | 256       | 0.02118                | 257    | 0.01054                |
| 3                          | 360       | 0.02843                | 363       | 0.01828                | 365    | 0.01126                |
| 4                          | 461       | 0.02703                | 460       | 0.01640                | 461    | 0.00705                |
| 5                          | 564       | 0.02665                | 566       | 0.02410                | 563    | 0.00831                |
| 6                          | 641       | 0.02651                | 640       | 0.03322                | 639    | 0.01049                |
| 7                          | 700       | 0.02872                | 703       | 0.04919                | 698    | 0.01473                |
| 8                          | 729       | 0.02697                | 730       | 0.06102                | 729    | 0.01820                |
| 9                          | 735       | 0.02912                | 737       | 0.07750                | 736    | 0.03304                |
| 10                         | 707       | 0.03212                | 704       | 0.08884                | 708    | 0.02740                |
| 11                         | 662       | 0.03254                | 661       | 0.09984                | 664    | 0.03033                |
| 12                         | 641       | 0.03651                | 632       | 0.10682                | 640    | 0.03185                |
| 13                         | 603       | 0.03847                | 589       | 0.11009                | 603    | 0.03735                |
| 14                         | 554       | 0.03894                | 535       | 0.11618                | 557    | 0.04162                |
| 15                         | 502       | 0.03957                | 473       | 0.12102                | 508    | 0.04691                |
| 16                         | 480       | 0.03931                | 433       | 0.11932                | 482    | 0.04944                |
| 17                         | 464       | 0.04322                | 414       | 0.12201                | 461    | 0.05870                |
| 18                         | 439       | 0.04474                | 390       | 0.12950                | 438    | 0.06495                |
| 19                         | 425       | 0.04872                | 363       | 0.12984                | 421    | 0.06882                |
| 20                         | 402       | 0.05577                | 338       | 0.12996                | 399    | 0.07676                |
| Total                      | 10526     | 0.03453                | 10191     | 0.08047                | 10530  | 0.03160                |
| E $\leq$ 26 000 cm $^{-1}$ |           |                        |           |                        |        |                        |
| 0                          | 82        | 0.04560                | 82        | 0.03184                | -      | -                      |
| 1                          | 273       | 0.03683                | 276       | 0.02976                | -      | -                      |
| 2                          | 485       | 0.03799                | 485       | 0.02704                | -      | -                      |
| 3                          | 679       | 0.03949                | 683       | 0.02594                | -      | -                      |
| 4                          | 832       | 0.03583                | 849       | 0.02888                | -      | -                      |
| 5                          | 993       | 0.03511                | 1007      | 0.03557                | -      | -                      |
| 6                          | 1061      | 0.03574                | 1074      | 0.04327                | -      | -                      |
| 7                          | 1105      | 0.03687                | 1123      | 0.06028                | -      | -                      |
| 8                          | 1049      | 0.03376                | 1049      | 0.07379                | -      | -                      |
| 9                          | 981       | 0.03447                | 981       | 0.08988                | -      | -                      |
| 10                         | 880       | 0.03580                | 870       | 0.10130                | -      | -                      |
| 11                         | 772       | 0.03340                | 765       | 0.11047                | -      | -                      |
| 12                         | 703       | 0.03821                | 688       | 0.11478                | -      | -                      |
| 13                         | 643       | 0.03940                | 621       | 0.11491                | -      | -                      |
| 14                         | 599       | 0.04112                | 568       | 0.12002                | -      | -                      |
| 15                         | 540       | 0.04059                | 488       | 0.12256                | -      | -                      |
| 16                         | 508       | 0.04026                | 447       | 0.12119                | -      | -                      |

( To be continued)

| PES<br>$J$                                         | This Work |                        | POKAZATEL |                        | PES15K |                        |
|----------------------------------------------------|-----------|------------------------|-----------|------------------------|--------|------------------------|
|                                                    | $N_J$     | $\sigma$ (cm $^{-1}$ ) | $N_J$     | $\sigma$ (cm $^{-1}$ ) | $N_J$  | $\sigma$ (cm $^{-1}$ ) |
| 17                                                 | 484       | 0.04403                | 420       | 0.12342                | -      | -                      |
| 18                                                 | 469       | 0.04581                | 400       | 0.13151                | -      | -                      |
| 19                                                 | 456       | 0.05064                | 375       | 0.13184                | -      | -                      |
| 20                                                 | 436       | 0.05621                | 431       | 0.13117                | -      | -                      |
| Total                                              | 14030     | 0.03833                | 13682     | 0.07989                |        |                        |
| <hr/> <hr/> E $\leq$ 37 000 cm $^{-1}$ <hr/> <hr/> |           |                        |           |                        |        |                        |
| 0                                                  | 98        | 0.15349                | 96        | 0.08515                | -      | -                      |
| 1                                                  | 312       | 0.10341                | 315       | 0.08023                | -      | -                      |
| 2                                                  | 564       | 0.12777                | 572       | 0.10604                | -      | -                      |
| 3                                                  | 727       | 0.07496                | 738       | 0.06679                | -      | -                      |
| 4                                                  | 873       | 0.07327                | 890       | 0.05624                | -      | -                      |
| 5                                                  | 1032      | 0.06786                | 1052      | 0.06131                | -      | -                      |
| 6                                                  | 1073      | 0.04407                | 1088      | 0.05067                | -      | -                      |
| 7                                                  | 1113      | 0.04561                | 1131      | 0.06486                | -      | -                      |
| 8                                                  | 1051      | 0.03535                | 1060      | 0.07391                | -      | -                      |
| Total                                              | 6843      | 0.06475                | 6942      | 0.06695                |        |                        |

## References

- 5 Furtenbacher, T., Tóbiás, R., Tennyson, J., Polyansky, O. L., and Császár, A. G.: W2020: A Database of Validated Rovibrational Experimental Transitions and Empirical Energy Levels of H<sub>2</sub>O, *Journal of Physical and Chemical Reference Data*, 49, 033 101, <https://doi.org/10.1063/5.0008253>, 2020.
- Mizus, I. I., Kyuberis, A. A., Zobov, N. F., Makhnev, V. Y., Polyansky, O. L., and Tennyson, J.: High accuracy water potential energy surface for the calculation of infrared spectra, *Phil. Trans. Royal Soc. London A*, 376, 20170 149, <https://doi.org/10.1098/rsta.2017.0149>, 2018.
- Polyansky, O. L., Kyuberis, A. A., Zobov, N. F., Tennyson, J., Yurchenko, S. N., and Lodi, L.: ExoMol molecular line lists XXX: a complete high-accuracy line list for water, *Mon. Not. R. Astron. Soc.*, 480, 2597–2608, <https://doi.org/10.1093/mnras/sty1877>, 2018.
