# Supplementary material for: A semi-empirical potential energy surface and line list for H 2 16 O extending into the near-ultraviolet
Source: Copernicus journal article supplement (doi:10.5194/acp-20-10015-2020), 2020-08-27
Supplement: Supplementary file [file acp-20-10015-2020-supplement-title-page.pdf › acp-20-10015-2020-supplement-title-page.pdf]

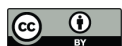

## *Supplement of*

# **A semi-empirical potential energy surface and line list for H<sub>2</sub><sup>16</sup>O extending into the near-ultraviolet**

**Eamon K. Conway et al.**

*Correspondence to:* Eamon K. Conway ([eamon.conway@cfa.harvard.edu](mailto:eamon.conway@cfa.harvard.edu))

- [acp-20-10015-2020-supplement-title-page.pdf](#)
- [HOT\\_WAT.f90](#)
- [Line\\_List.txt](#)
- [VBOs.txt](#)
- [read\\_me.txt](#)
- [table1.pdf](#)

The copyright of individual parts of the supplement might differ from the CC BY 4.0 License.
